1 **Climate Change and Eco-Anxiety in the US: Predictors, Correlates, and Potential**  
2 **Solutions**

3  
4  
5  
6

7 **Corresponding Author:**

8 **Katherine Kricorian**

9 MiOra

10 17328 Ventura Blvd., No 190

11 Encino, CA 91316

12 Krn830@gmail.com

13

14

15 **Karin Turner**

16 MiOra

17 17328 Ventura Blvd., No 190

18 Encino, CA 91316

19

20

21

22

23

24

25

26

27

28

29 The authors have no conflicts of interest to declare and received no specific funding for

30 this research.

31

32 **Climate Change and Eco-Anxiety in the US: Predictors, Correlates, and Potential**  
33 **Solutions**

34  
35 **ABSTRACT**

36  
37 Climate change has many adverse human health effects, including increased anxiety.  
38 However, eco-anxiety may also motivate climate action. An online survey was  
39 developed and distributed to examine factors associated with eco-anxiety. Logistic  
40 regression analysis showed that significant predictors of eco-anxiety include greater  
41 media exposure to climate change information, more frequent discussions about climate  
42 change with friends and family, the perception that climate change will soon impact one  
43 personally, being younger, and being female. Additional analyses suggested that eco-  
44 anxiety was associated with a range of both positive and negative emotional impacts  
45 including motivation, interest, sadness, and tension. Eco-anxiety was also associated  
46 with greater likelihood to engage in environmental behaviors such as recycling.  
47 Volunteering for environmental causes and accessing straightforward information with  
48 less scientific jargon were found to have particular potential for anxiety reduction among  
49 the eco-anxious. The research suggests practical strategies to reduce eco-anxiety while  
50 retaining engagement in mitigating climate change.

51  
52 **Keywords:** Anxiety; Mental Health; Climate Change; Eco-Anxiety; Global Warming;  
53 Environmental Health Impacts

54

## 55 **BACKGROUND**

56           The World Health Organization calls climate change the biggest health threat that  
57 humanity faces today (World Health Organization, 2021). Beyond the immediate  
58 casualties caused by extreme weather events, climate change has also been  
59 associated with increased rates of allergies, asthma, heart attacks and strokes (Parker  
60 et al., 2019). Furthermore, Taylor (2020) discussed how climate change can increase  
61 both the likelihood of extreme weather events and pandemics, because warmer  
62 temperatures can create more hospitable habitats for disease vectors and viruses.  
63 People escaping extreme weather events may seek mass housing in shelters with other  
64 climate refugees, exacerbating the spread of contagious disease. Warmer temperatures  
65 and shorter winters allow insects carrying disease to breed for longer and travel further,  
66 facilitating insect-borne infectious disease outbreaks. For example, in Latin America  
67 alone, a 4°C increase in temperature is projected to increase the number of dengue  
68 fever cases by 8 million each year. Pollution has also been linked to various  
69 neurological and behavioral disorders, ranging from Alzheimer's disease to autism  
70 spectrum disorders (Ramadan and Ataalah, 2021).

71           One often overlooked effect of climate change's rising threat is that it can  
72 increase anxiety levels and worsen population mental health. Sociopolitical, economic  
73 and physical health problems caused by climate change, including forced migration,  
74 food shortages, job loss, increases in disease transmission, air pollution, and loss of  
75 social support can lead to mental illness (American Psychiatric Association, 2019).  
76 Exposure to natural disasters and severe weather events are correlated with anxiety,  
77 depression, sleep disorders, and post-traumatic stress disorder (PTSD) (Warsini et. al,

78 2014). Edwards, Gray and Borja (2021) found that experiencing natural disasters was  
79 associated with increased parental stress, food insecurity, and family violence, among  
80 other effects. Cruz et al. (2020) found specific extreme weather impacts associated with  
81 increased rates of psychological distress, anxiety, depression and PTSD, including  
82 whether the victims had experienced evacuation, displacement, disruption of essential  
83 services (e.g. electricity), and inability to attend work or school.

84 Ruminations about climate change's future impacts can also damage mental  
85 health (Pihkala, 2018). "Eco-anxiety" is one term used to describe an emotional  
86 response to climate change caused by fear of the impact of climate change on one's  
87 future (or the futures of loved ones), characterized by anxiety and stress. However,  
88 emotions related to climate change are nuanced and complex. Ramadan et al. (2021),  
89 identified ten different conceptualizations of the negative emotional response to climate  
90 change, including climate anxiety, climate change worry, eco-anxiety, and eco-  
91 paralysis. Stanley et al. (2021) further explored the differing implications and impacts of  
92 eco-depression, eco-anger, and eco-anxiety. Clayton and Karazsia (2020) developed a  
93 measure of climate change anxiety, including subscales for cognitive and functional  
94 impairments, and found correlations with general anxiety and depression. Eco-anxiety  
95 harms even people who have not personally experienced a climate crisis, causing  
96 trauma, stress, grief, depression, and general cognitive impairment (Dailianis, 2020).  
97 Hurley et al. (2022) described climate anxiety as a rational response given the  
98 enormous impacts of climate change, and Verplanken and Roy (2013) found that  
99 people who frequently worried about climate change were no more likely than infrequent  
100 ecological worriers to have pathological general levels of worry or emotional instability.

101 In contrast, Reyes et al. (2021) found that higher climate change anxiety was  
102 associated with lower mental health in a sample of young adults from the Philippines.

103 Although eco-anxiety may be a reasonable and comprehensible reaction to  
104 climate change, it can still be distressing and damaging (Comtesse et al., 2021).  
105 Therapeutic strategies to address these issues have not been researched extensively,  
106 but include resilience training and climate awareness. One important public health  
107 challenge in treating eco-anxiety is helping people learn to cope with climate change  
108 without becoming apathetic, managing a society's emotional responses at a complex  
109 level. Behavioral strategies may play a role in managing eco-anxiety while retaining  
110 some of its benefits, although these strategies have not been closely analyzed (Clayton,  
111 2020). For example, some studies suggest the use of "social prescribing efforts" as  
112 solutions to climate anxiety. Social prescribing in general, such as the promotion of  
113 community-based activities including leisure, education and the arts, has been shown to  
114 have significant positive impact on mental and physical health (Munford et al., 2020).  
115 Social prescribing activities that may have a positive effect on eco-anxiety include  
116 spending time in nature and community-based work to support social connections and  
117 community-wide engagement, but these solutions have not yet been studied in-depth  
118 (Cunsolo et. al, 2020; Howarth et al., 2020).

119 Some studies suggest that eco-anxiety has not been associated with any  
120 particular behavioral responses to climate change (Clayton & Karazsia, 2020).  
121 However, some researchers suggest that stress about climate change motivates people  
122 and encourages climate action, hypothesizing that these effects may serve as potential  
123 positive aspects of eco-anxiety. Sanson and Bellemo (2021) stated that, when it comes

124 to climate change, “action is the antidote to despair.” Verplanken and Roy (2013) found  
125 that habitual ecological worry was associated with positive environmental behaviors,  
126 such as recycling. Schwartz et al. (2022) determined that collective climate action may  
127 have a protective effect against climate anxiety, but did not find this result for individual  
128 environmental actions (such as personal recycling). In contrast, other studies suggest  
129 that eco-anxiety can engender feelings of “eco-paralysis,” or mental inhibition and levels  
130 of anxiety so extreme that they prevent one from taking action, resulting in  
131 immobilization or apathy (Albrecht, 2011; Usher, 2019).

132 One factor that may contribute to eco-anxiety is lack of information or  
133 overwhelming information about climate change and its effects. Exposure to climate  
134 change through media influences stress and mental health (American Psychiatric  
135 Association, 2019). Additionally, the indifference and ignorance of others to the climate  
136 crisis and lack of coordinated global action to mitigate it can cause great distress among  
137 those who care about the environment, leading to eco-anxiety (Rao and Powell, 2021).  
138 Frequent exposure to climate change information, such as through social media,  
139 newspapers, and television, has been correlated with heightened rates of eco-anxiety.  
140 Fritze et al. (2008) observed that climate change information can be so worrying that  
141 people react with skepticism and denial. Dodds (2021) noted that climate change doubt,  
142 denial and apathy serve as defense mechanisms against climate anxiety. Interestingly,  
143 research has also associated media exposure to climate change information with  
144 empowerment, indicating the potential additional motivational features of eco-anxiety.  
145 For example, Maran and Begotti (2021) found that climate anxiety in a sample of Italian  
146 students was positively correlated with both media exposure to climate change

147 information and self-efficacy in dealing with climate change. Another study observed  
148 that newspapers and media sources in the United States are often selective in the  
149 content they portray, which can influence climate perceptions. Many newspapers  
150 portray teen activism against climate change in a negative light to appeal to adult  
151 readers, increasing eco-anxiety and sentiments that not enough work is being done or  
152 that the being done is ineffectual. Additionally, fear of being misrepresented in the  
153 media can repel climate activists from engaging productively with media, resulting in  
154 less coverage of climate change efforts (Duffy, 2022).

155       Eco-anxiety is also influenced by factors including socioeconomic status,  
156 geographic location, and culture, causing it to disproportionately impact different groups.  
157 Disadvantaged groups may be more likely to be exposed to environmental  
158 contaminants: Verbeek (2018) found that levels of air pollution were correlated with  
159 lower household incomes and higher unemployment levels. Those with a lack of access  
160 to resources and living in more vulnerable geographic conditions, such as in rural areas  
161 or closer to coasts, are more likely to experience climate anxiety (Cianconi et. al, 2020).  
162 Rural individuals, who may be more likely to labor in agriculture and thus be especially  
163 dependent on the environment, are more likely to experience climate-related insomnia,  
164 obsessive thinking, panic attacks, and appetite changes or eating disorders (Castellone,  
165 2018). In addition to rural farmers, Indigenous Peoples, to whom the land has enhanced  
166 cultural significance, are also more likely to suffer from eco-anxiety (Cunsolo & Ellis,  
167 2018; Middleton et. al, 2020).

168       Marginalized individuals such as people belonging to stigmatized racial, gender,  
169 and economic groups are more likely to suffer from the negative impacts of climate

170 change, including mental illness (Hayes et. al, 2018). Cruz et al.'s (2020) analysis  
171 suggested that women, especially those in more vulnerable social positions,  
172 experienced greater negative mental health impacts of extreme weather events and that  
173 populations with unemployment or prior medical conditions are more likely to  
174 experience mental health declines after severe weather. Obradovich et al. (2018) found  
175 that climate change in the form of multiyear temperature increases and extreme  
176 weather events was associated with declines in mental health, with these effects greater  
177 for women and people with lower incomes.

178         Age also influences the mental health effects of climate change. Young people  
179 with developing brains, limited emotional resilience, and less experienced adapting to  
180 threats may be at greater risk for the effects of climate change and have more climate  
181 stress (Vergunst & Berry, 2021). Hickman et al. (2021) conducted a global survey of  
182 young people and found that more than half of 16-25 year olds were "very" or  
183 "extremely" worried about climate change and reported feeling sad, anxious, angry,  
184 powerless, helpless and guilty regarding climate change. Nearly half of young people  
185 surveyed said their feelings about climate change negatively affect their daily lives and  
186 three quarters were fearful of the future. Experiencing extreme stress about the climate  
187 can cause damage to brain chemistry, structure and function, creating the potential for  
188 even more serious mental illness later in life, including substance abuse and depression  
189 (Wu et. al, 2020). These age-related impacts of climate change may also have  
190 implications for the effects of climate anxiety on motivation and stress. Political  
191 orientation, eco-skepticism, and eco-anxiety may also be related. Cann, Weaver and  
192 Williams (2021) conducted social media sharing analysis of climate change information



193 and found that levels of climate skepticism were associated with political ideology and  
194 information network polarization. As climate change continues to affect the planet, eco-  
195 anxiety and broad-scale research to understand the demographic and information  
196 exposure factors associated with it have increasing importance. It is critical that  
197 populations with high likelihood of suffering from eco-anxiety can be targeted for  
198 interventions, and additional exploration is needed regarding the efficacy of eco-anxiety  
199 interventions given that research in this area has been limited. Therefore, we conducted  
200 research to assess factors associated with climate change anxiety and potential  
201 solutions.

202

## 203 **METHODS**

204 An English-language online survey questionnaire was developed and  
205 distributed to collect data about climate change attitudes. Institutional Review  
206 Board (IRB) exemption was received from WCG IRB, an IRB specializing in  
207 medical and public health research reviews. The IRB classified the survey as  
208 exempt because it was an anonymous survey and no personally-identifying  
209 information (PII) was collected from respondents. The survey instrument was  
210 developed based on review of the literature and previously published surveys,  
211 and programmed using AYTM online survey development and deployment  
212 software. AYTM is a research software company that maintains a survey panel  
213 of over 100 million potential respondents in 40 countries.

214 Potential US respondents were invited by text message and email to  
215 participate in an online, English-language survey to collect data about climate

216 change attitudes. These potential respondents had previously agreed to  
217 participate in surveys for research purposes. In January 2022, approximately  
218 N=5,000 potential respondents were invited to participate in the survey and a  
219 sample of N=2,000 US adults aged 18+ completed the survey, resulting in a  
220 response rate of 40%. At the beginning of the survey, respondents were  
221 informed of the purposes of the study and agreed to participate voluntarily.  
222 Formal consent was not obtained because survey data was collected  
223 anonymously. Survey respondents consisted of a broad range of ages, races,  
224 ethnic backgrounds, income levels and geographic origins across the US.

225         The survey aimed to assess factors associated with eco-anxiety and  
226 potential interventions to reduce its negative effects on mental health and quality  
227 of life while retaining engagement and motivation regarding climate change. At  
228 the beginning of the survey, respondents were asked to indicate their age and  
229 their country of residence and to provide their consent to participate in a survey  
230 about climate change. People who were under age 18 and/or currently lived  
231 outside the US were thanked and terminated from the study.

232         In the first portion of the survey, respondents were asked to indicate their  
233 knowledge, beliefs, behavior and emotions regarding climate change. The  
234 complexity and measurement of the negative emotional responses to climate  
235 change has been the subject of much exploration and discussion. Measures  
236 used were informed by several scholarly approaches, including those of Clayton  
237 and Karazsia (2020), Coffey et al., (2021), Helm et al., (2018), Hogg et al.,  
238 (2021), Stanley et al. (2021) and Stewart (2021). In the next section of the

239 survey, respondents answered questions regarding their demographics. At the  
240 end of the survey, respondents were thanked for their participation. Data were  
241 analyzed using SPSS v.28.0 statistical analysis software. First, logistic  
242 regression analysis was done to understand predictors of climate anxiety. Then,  
243  $\chi^2$  tests were conducted to examine the relationship of climate anxiety with  
244 attitudes and behavior. In both the logistic regression and the  $\chi^2$  tests, analysis  
245 focused on self-reported responses to the question “Does climate change make  
246 you feel anxious?”

247

## 248 **RESULTS**

249 The survey sample consisted of people with a range of ages, relationship statuses,  
250 education levels and racial/ethnic backgrounds (see Table 1). More females than males  
251 completed the survey, but other demographic characteristics such as race and ethnicity  
252 mirrored US population values according to the US Census. More than one quarter of  
253 survey respondents (26%) indicated they were anxious about climate change, and the  
254 remainder did not (74%) (see Figure 1).

255

256

257 **Table 1: Survey sample characteristics**

| Gender                      | Percent | Education Level     | Percent              | Relationship Status             | Percent |
|-----------------------------|---------|---------------------|----------------------|---------------------------------|---------|
| Female                      | 57.1%   | No college          | 17.0%                | Married                         | 41.5%   |
| Male                        | 43.0%   | Some college        | 26.7%                | Single                          | 34.1%   |
|                             |         | 2yr degree          | 12.0%                | Divorced                        | 10.5%   |
|                             |         | 4yr degree          | 27.8%                | Living with a significant other | 7.2%    |
|                             |         | Grad school degree  | 10.8%                | Widowed                         | 3.9%    |
|                             |         | Professional degree | 5.9%                 | Engaged                         | 1.4%    |
|                             |         |                     |                      | It's complicated                | 1.6%    |
|                             |         |                     |                      |                                 |         |
| Race/ Ethnicity             |         | Age                 |                      | Annual Household Income         |         |
| White / Caucasian           | 63.4%   | 18-24               | 7.2%                 | \$0 - \$25,000                  | 26.4%   |
| Black / African-American    | 14.1%   | 25-34               | 16.3%                | \$25,000 - \$50,000             | 26.6%   |
| Hispanic / Latino / Spanish | 12.4%   | 35-44               | 20.2%                | \$50,000 - \$75,000             | 20.0%   |
| Asian                       | 5.7%    | 45-54               | 18.8%                | \$75,000 - \$100,000            | 13.0%   |
| Multiracial                 | 2.0%    | 55-64               | 20.2%                | \$100,000 - \$200,000           | 12.2%   |
| Native American             | 0.7%    | 65-74               | 15.2%                | \$200,000 - \$500,000           | 1.9%    |
| Other Race                  | 1.9%    | 75+                 | 2.3%                 | >\$500,000                      | 0.2%    |
|                             |         |                     |                      |                                 |         |
| Parental Status             |         | Mean Age            | 47.9 years (SD=15.4) |                                 |         |
| No children                 | 71.7%   | Median Age          | 48.0 years           |                                 |         |
| 1 child                     | 13.0%   | Age Range           | 18-90 years          |                                 |         |
| 2 children                  | 9.5%    |                     |                      |                                 |         |
| 3 children                  | 4.3%    |                     |                      |                                 |         |
| 4 children                  | 1.1%    |                     |                      |                                 |         |
| 5+ children                 | 0.6%    |                     |                      |                                 |         |

258  
259

260 **Figure 1: Logistic regression classification accuracy**

261

262 **ECO-ANXIETY PREDICTORS**

263 In the logistic regression model, climate anxiety served as the dependent  
 264 variable and demographics and climate change information exposure were independent  
 265 variables. The model correctly classified 92% of those without eco-anxiety, substantially  
 266 higher than the 74% correct classification expected by the null model. The model also  
 267 correctly classified 33% of those with eco-anxiety, significantly better than the 26%  
 268 correct classification expected by the null model (see Figure 1). The overall model had a  
 269 significant fit at  $p < .0001$ . The Nagelkerke  $R^2 = .296$ , so about one third of the variation in  
 270 the data was explained by the model (see Table 2). This is a moderately strong result  
 271 for a social science model.

272

273 **Table 2: Logistic regression results and model fit**

|                                                                                               | B      | S.E.  | Wald $\chi^2$ | df | Sig.         | Odds ratio |
|-----------------------------------------------------------------------------------------------|--------|-------|---------------|----|--------------|------------|
| <b>How familiar are you with climate change?</b>                                              |        |       | 1.621         | 4  | 0.805        |            |
| Very                                                                                          | 0.006  | 0.232 | 0.001         | 1  | 0.980        | 1.006      |
| Somewhat                                                                                      | 0.133  | 0.250 | 0.281         | 1  | 0.596        | 1.142      |
| Not very                                                                                      | 0.205  | 0.458 | 0.199         | 1  | 0.655        | 1.227      |
| Not at all                                                                                    | 1.089  | 0.957 | 1.295         | 1  | 0.255        | 2.971      |
| <b>How often do you hear about climate change in the media?</b>                               |        |       | 22.665        | 8  | <b>0.004</b> |            |
| 2-3 times per week                                                                            | -0.028 | 0.262 | 0.012         | 1  | 0.914        | 0.972      |
| About once a week                                                                             | -0.448 | 0.289 | 2.395         | 1  | 0.122        | 0.639      |
| 2-3 times per month                                                                           | -0.962 | 0.339 | 8.044         | 1  | 0.005        | 0.382      |
| About once a month                                                                            | -0.097 | 0.364 | 0.071         | 1  | 0.790        | 0.908      |
| Every 2-3 months                                                                              | -1.894 | 0.677 | 7.837         | 1  | 0.005        | 0.150      |
| Several times a year                                                                          | -1.054 | 0.513 | 4.220         | 1  | 0.040        | 0.348      |
| Once a year or less                                                                           | -0.120 | 0.715 | 0.028         | 1  | 0.867        | 0.887      |
| Never                                                                                         | -1.909 | 1.094 | 3.043         | 1  | 0.081        | 0.148      |
| <b>How often do you discuss climate change with friends, family or other people you know?</b> |        |       | 26.866        | 8  | <b>0.001</b> |            |
| 2-3 times per week                                                                            | 0.967  | 0.475 | 4.145         | 1  | 0.042        | 2.629      |
| About once a week                                                                             | 0.398  | 0.474 | 0.706         | 1  | 0.401        | 1.490      |
| 2-3 times per month                                                                           | 0.709  | 0.478 | 2.207         | 1  | 0.137        | 2.033      |
| About once a month                                                                            | -0.103 | 0.496 | 0.044         | 1  | 0.835        | 0.902      |
| Every 2-3 months                                                                              | 0.531  | 0.530 | 1.004         | 1  | 0.316        | 1.701      |
| Several times a year                                                                          | 0.422  | 0.524 | 0.649         | 1  | 0.421        | 1.526      |
| Once a year or less                                                                           | -0.091 | 0.549 | 0.028         | 1  | 0.868        | 0.913      |
| Never                                                                                         | -0.628 | 0.521 | 1.453         | 1  | 0.228        | 0.534      |

|                                                                                         | B      | S.E.  | Wald $\chi^2$ | df | Sig.         | Odds ratio |
|-----------------------------------------------------------------------------------------|--------|-------|---------------|----|--------------|------------|
| <b>Generally speaking, do you usually think of yourself as:</b>                         |        |       | 3.551         | 3  | 0.314        |            |
| Republican                                                                              | -0.445 | 0.242 | 3.374         | 1  | 0.066        | 0.641      |
| Independent                                                                             | -0.115 | 0.198 | 0.336         | 1  | 0.562        | 0.891      |
| Something else (Not Democrat, Republican or Independent)                                | -0.245 | 0.296 | 0.684         | 1  | 0.408        | 0.783      |
| <b>When do you think climate change will start harming you and your friends/family?</b> |        |       | 47.850        | 8  | <b>0.000</b> |            |
| In 1-5 years                                                                            | -0.437 | 0.233 | 3.517         | 1  | 0.061        | 0.646      |
| In 6-10 years                                                                           | -0.948 | 0.352 | 7.234         | 1  | 0.007        | 0.388      |
| In 11-15 years                                                                          | -1.011 | 0.513 | 3.885         | 1  | 0.049        | 0.364      |
| In 16-25 years                                                                          | -1.817 | 0.642 | 7.994         | 1  | 0.005        | 0.163      |
| In 26-50 years                                                                          | -0.913 | 0.469 | 3.795         | 1  | 0.051        | 0.401      |
| In 51-100 years                                                                         | -0.854 | 0.614 | 1.934         | 1  | 0.164        | 0.426      |
| More than 100 years from now                                                            | -1.203 | 0.476 | 6.380         | 1  | 0.012        | 0.300      |
| Never                                                                                   | -3.143 | 0.611 | 26.436        | 1  | 0.000        | 0.043      |
| <b>Age</b>                                                                              | -0.011 | 0.005 | 4.421         | 1  | <b>0.036</b> | 0.989      |
| <b>Gender(Male)</b>                                                                     | -0.385 | 0.169 | 5.173         | 1  | <b>0.023</b> | 0.680      |
| <b>Highest level of education completed</b>                                             |        |       | 6.168         | 5  | 0.290        |            |
| Some college                                                                            | -0.048 | 0.272 | 0.031         | 1  | 0.859        | 0.953      |
| 2yr degree                                                                              | -0.171 | 0.317 | 0.292         | 1  | 0.589        | 0.843      |
| 4yr degree                                                                              | 0.267  | 0.277 | 0.926         | 1  | 0.336        | 1.305      |
| Grad school degree                                                                      | -0.370 | 0.351 | 1.114         | 1  | 0.291        | 0.691      |
| Professional degree                                                                     | -0.253 | 0.410 | 0.382         | 1  | 0.536        | 0.776      |
| <b>Constant</b>                                                                         | 0.420  | 0.543 | 0.599         | 1  | 0.439        | 1.522      |

274  
275

**Omnibus Tests of Model Coefficients**

|       | square  | df | Sig.  |
|-------|---------|----|-------|
| Step  | 228.213 | 38 | 0.000 |
| Block | 228.213 | 38 | 0.000 |
| Model | 228.213 | 38 | 0.000 |

**Model Summary**

|  | -2 Log likelihood    | Snell R Square | Nagelkerke R Square |
|--|----------------------|----------------|---------------------|
|  | 938.305 <sup>a</sup> | 0.204          | 0.296               |

276

277 Factors including familiarity with climate change, political party, and education did  
278 not serve as significant predictors of climate anxiety in the logistic regression model  
279 (see Table 2). Frequency of media exposure about climate change was associated with  
280 climate anxiety: in general, less frequent self-reported media exposure was associated  
281 with lack of climate anxiety. Similarly, infrequency of climate discussions with friends  
282 and family was associated with lack of climate anxiety. People who felt it would be a  
283 long time before climate change impacted them personally were less likely to be  
284 anxious, as were males and older people.

285

## 286 **ECO-ANXIETY CORRELATES**

287 Associations between eco-anxiety and respondents' attitudes and behavior was  
288 examined using  $\chi^2$  analysis. Those who indicated they were not anxious about climate  
289 change were significantly more likely than those with eco-anxiety to say that climate  
290 change is harmless, a hoax, not going to affect my daily life, and exaggerated (all  
291 comparisons  $p < .05$ , see Figure 2). People without eco-anxiety were also significantly  
292 more likely to say that climate change is caused mostly by natural changes in the  
293 environment (28.2% vs. 15.8%,  $p < .05$ ). Those with eco-anxiety were significantly more  
294 likely than those without eco-anxiety to say climate change is something almost all  
295 scientists agree about, is caused mostly by human activities, is real, and is already  
296 happening (all comparisons  $p < .05$ ). Interestingly, only about half (52.3%) of those  
297 without climate anxiety said they believe climate change is real.

298

299 **Figure 2: Beliefs about climate change**

300

301 People without eco-anxiety were significantly more likely to say that information  
302 about climate change is fake, one-sided, not trustworthy, and too political (all  
303 comparisons  $p < .05$ , see Figure 3). More than a third (35.2%) of those without eco-  
304 anxiety said information about climate change is too political vs. 25.0% of those with  
305 eco-anxiety ( $p < .05$ ). Those with climate change anxiety were significantly more likely to  
306 say that information about climate change is hard to understand, confusing and  
307 overwhelming ( $p < .05$ ). Nearly half (47.0%) of climate anxious respondents said climate  
308 change information is overwhelming vs. just 19.9% of respondents without climate  
309 anxiety ( $p < .05$ ).

310

### 311 **Figure 3: Perceptions of information about climate change**

312

313 Respondents were also asked to indicate whether they felt other emotions about  
314 climate change. People without eco-anxiety were more likely to say they felt skeptical  
315 (16.2% vs. 8.9%,  $p < .05$ , see Figure 4). People with eco-anxiety were more likely to  
316 report a range of emotions: they were more likely to report being motivated and  
317 interested regarding climate change, but they were also more likely to say they felt  
318 depressed, angry, sad, overwhelmed, frustrated and worried (all comparisons  $p < .05$ ).

319 The survey also asked respondents to report how climate change is affecting their  
320 mental health, if at all. The results showed that 84.7% of those who were not anxious  
321 about climate change said their mental health was unaffected by climate change vs.  
322 48.4% of those with climate change anxiety ( $p < .05$ ). Nearly half (45.5%) of those with  
323 climate change anxiety said climate change made their mental health somewhat worse  
324 (vs. only 11.5% of those without climate change anxiety,  $p < .05$ ) and 6.2% (vs. 3.8%,

325 p<.05) said climate change made their mental health a lot worse (see Figure 5). People  
326 with climate change anxiety were significantly more likely to indicate that their eco-  
327 anxiety negatively impacted their wellbeing and quality of life. They were more likely to  
328 say that their concerns about climate change made it harder to get school/work  
329 assignments done (5.2% vs. 2.8%), have fun with family and friends (7.5% vs. 2.6%),  
330 and concentrate (10.2% vs. 4.2%) (all comparisons p<.05) (see Figure 6).

331

332 **Figure 4: Feelings about climate change**

333

334 **Figure 5: Climate change impact on mental health**

335

336 **Figure 6: Cognitive and functional impairments due to eco-anxiety**

337

338

## 339 **POTENTIAL SOLUTIONS**

340 People with climate change anxiety were significantly more likely to  
341 exhibit environmentally conscious behaviors, such as being vegetarians, driving  
342 an electric/hybrid car, using public transportation, voting with relation to climate  
343 issues, recycling, reducing energy usage, and having confidence that their  
344 actions can have an impact on climate change (p<.05, see Figure 7). People  
345 with climate anxiety were more likely to support organizations and charities  
346 related to the environment or the effects of climate change through donating  
347 time or money (24.7% vs. 10.2%, p<.05, see Figure 8). The eco-anxious were  
348 also significantly more likely to support many other types of charitable



349 organizations, such as animal charities, human and social services and health  
350 charities ( $p < .05$ ). However, people without climate change anxiety were  
351 significantly more likely to support religious organizations (19.3% vs. 14.6%,  
352  $p < .05$ ). Of respondents not involved with environmental organizations, those  
353 with climate anxiety were more likely to cite structural barriers like lack of time,  
354 access, awareness, or experience (comparisons  $p < .05$ , see Figure 9). People  
355 without eco-anxiety were more likely to say that lack of interest was the reason  
356 they do not volunteer for or donate to environmental causes (17.0% vs. 6.4%,  
357  $p < .05$ ).

358

359 **Figure 7: Environmental behaviors**

360

361 **Figure 8: Current charitable behavior**

362

363 **Figure 9: Reasons respondent does not volunteer for or donate to environmental**  
364 **organizations**

365

366 Those without climate anxiety were more likely to say that climate anxiety  
367 would be reduced by less emphasis on climate change among government  
368 leaders and less media coverage of climate change (both comparisons  $p < .05$ ,  
369 see Figure 10). People with climate anxiety were more likely to state that their  
370 stress would be reduced by personal actions such as donating money or time to  
371 environmental causes, learning more about current climate change reduction  
372 efforts, and learning how they can help climate change efforts (all comparisons  
373  $p < .05$ ) Those with climate anxiety were also more likely to cite the importance to  
374 institutional efforts in reducing eco-anxiety, including the need for additional laws

375 to mitigate climate change and more scientific research into renewable energy  
376 sources (comparisons  $p < .05$ ).

377

378 **Figure 10: Factors that would make respondent feel less worried or anxious about**  
379 **climate change**

380

## 381 **DISCUSSION**

382 Based on the logistic regression model results, climate change anxiety was  
383 associated with greater self-reported frequency of hearing about climate change in the  
384 media and discussing climate change with friends and family. However, the direction of  
385 causality was not clear: media exposure to climate change information and talking about  
386 it might cause climate change anxiety, or people who are already worried about climate  
387 change might seek out information and want to talk about it with others. Younger age  
388 and female gender were also associated with greater likelihood of climate change  
389 anxiety. Furthermore, people who thought climate change would happen further into the  
390 future were less likely to have climate change anxiety. These results support prior  
391 research that has shown that females have higher baseline levels of general anxiety,  
392 which may contribute to their likelihood to develop climate change anxiety (Bahrami &  
393 Yousefi, 2011). Young people, especially if they expect climate change to cause  
394 damage in the shorter term future, would logically be more anxious about climate  
395 change because they may anticipate that their lives overall will be more affected by it  
396 than older people, since young people expect to have more remaining years of life. This  
397 indicates that climate anxiety has several demographic factors that must be recognized  
398 when developing tailored, targeted solution strategies.

399           Some variables in the logistic regression did not have the expected relationship  
400 with eco-anxiety. Self-defined familiarity with climate change was not significantly  
401 associated with climate change anxiety. It was hypothesized that the greater knowledge  
402 that people felt they had about climate change, the more anxious they would be. The  
403 model results did not support this hypothesis. Political party affiliation and education  
404 levels also did not have significant relationships with climate change anxiety. Prior  
405 research would suggest that more politically conservative and less educated survey  
406 respondents would be less likely to have climate change anxiety, but these results were  
407 not found in the analysis.

408           The results identified both positive and negative correlates of climate change  
409 anxiety. People with eco-anxiety were more likely to say that climate change makes  
410 them feel hopeless, tense, and troubled and made their mental health either a lot or  
411 somewhat worse. Additionally, people with eco-anxiety were more likely to report that  
412 their climate concerns damaged their ability to work productively, concentrate, and  
413 enjoy free time with friends and family. This indicates the damaging toll that eco-anxiety  
414 may take on personal wellbeing. However, the research also revealed several potentials  
415 to utilize eco-anxiety and produce a positive impact. For example, those with climate  
416 change anxiety were also more likely to say they take action in their daily lives to reduce  
417 their contributions to climate change, being more likely to look for ways to reduce  
418 energy usage, recycle, and use public transportation. Those with eco-anxiety were more  
419 likely to say that climate change makes them feel motivated and interested and were  
420 more likely to volunteer and/or donate to environmental organizations. Because eco-  
421 anxiety is so complex, with both positive and negative aspects, it is important to develop

422 and identify solution strategies that will exert the greatest impact on bettering mental  
423 health while fighting apathy and retaining engagement in the climate cause.

424 To this end, the research identified several solutions to climate change anxiety,  
425 including behavioral strategies, a potential indicated by previous studies. Those with  
426 anxiety were more likely to believe that environmental volunteering would reduce their  
427 anxiety. This may be because volunteering offers opportunities to directly impact the  
428 local environment and help volunteers have a personal impact on the cause, which may  
429 soothe anxiety about lack of involvement or feelings of helplessness. Those who did not  
430 volunteer cited reasons such as a lack of experience or awareness of how to get  
431 involved. To combat this, environmental organizations may have an opportunity to  
432 promote volunteering opportunities and organize easy-to-access climate volunteering  
433 events for various communities. Those with eco-anxiety were also more likely to say  
434 more information on climate change causes, effects, and current mitigation efforts would  
435 reduce their anxiety, as well as climate change information that is easier to understand.  
436 To prevent media from being overwhelming and exacerbating climate anxiety, clear and  
437 concise information about climate change and the science behind it should be promoted  
438 in ways that contain limited jargon and are easy to understand for broader populations.

439 The results supported previous findings about eco-anxiety as a motivating factor  
440 for taking action through environmentally conscious behaviors and support of climate  
441 charities, but this effect is counterbalanced by the potential for worsened quality of life  
442 through damaged mental health and prevalence of discouraging emotions. The  
443 research built on previous findings by identifying specific negative impacts of eco-  
444 anxiety, such as trouble focusing and enjoying free time. The authors found that people

445 who were anxious about climate change were more likely to hear about it frequently in  
446 the media, but felt information about climate change is overwhelming and hard to find  
447 and understand.

448         Limitations of the study include that the research was conducted only in English  
449 and only among US residents. Additionally, as the survey was conducted online,  
450 individuals without Internet access were unable to respond. The self-reported  
451 environmental and charitable behavior results may have been affected by events such  
452 as the COVID-19 pandemic, which prevented many people from volunteering in-person  
453 and potentially increased eco-anxiety rates. Furthermore, survey respondents had  
454 previously agreed to participate in research projects by being part of the survey panel  
455 used to conduct the reserach. These people may not fully represent the US population  
456 as a whole. Finally, the response rate, although high for an online survey, was not  
457 100%. It is possible that the people who did not respond to the survey invitation are  
458 somehow different than those who did complete the survey.

459         The potential eco-anxiety solutions are based on self-reports about the factors  
460 that survey respondents thought would decrease their eco-anxiety; however, laypeople  
461 are often not the best predictors of their own future reactions (e.g., Poon, Koehler and  
462 Buehler, 2014). Even if actions that respondents felt could mitigate eco-anxiety would not  
463 immediately do so, they could nonetheless have societal benefits. Additionally,  
464 participation in social activities like volunteering could increase social cohesion and  
465 community connections, which previous research has shown have positive effects on  
466 psychological resilience and anxiety reduction, as well as other beneficial health  
467 outcomes (Bowe et al., 2021; Generaal et al., 2019; Howarth et al., 2020; Robinette et al.,

468 2018; Robinette et al., 2021). Furthermore, the study did not cover personal experiences  
469 with climate-influenced weather changes. Demski et al. (2017) found that personal  
470 experience with extreme weather events like floods significantly increases people's  
471 judgments of the importance of climate change as a social issue and their level of  
472 personal risk. Future research should further explore the relationship of perceived  
473 personal experience with climate-change-driven events, such as droughts or wildfires,  
474 with eco-anxiety.

475

## 476 **CONCLUSIONS**

477 The results suggest that media exposure to climate change information was  
478 associated with higher likelihood of climate anxiety, but that self-defined level of  
479 knowledge about climate change was not significantly related to climate anxiety  
480 likelihood. These results may be related to eco-anxious individuals' significantly higher  
481 likelihood to see climate change information as confusing, overwhelming, or hard to  
482 understand. Those with eco-anxiety were significantly more likely to indicate that more  
483 information about climate change's causes, effects, and current efforts would reduce  
484 their anxiety. Developing and distributing straightforward, easy-to-understand climate  
485 change information may reduce eco-anxiety associated with media exposure while  
486 ensuring that these individuals remain accurately informed about the issue. More  
487 research is needed to explore the relationship between media exposure, knowledge,  
488 and eco-anxiety, as well as which information adaptations may most effectively reduce  
489 eco-anxiety and its association with media.

490 The findings support previous research about the positive and negative effects of

491 eco-anxiety, and confirmed the hypothesis that anxiety about climate change could be  
492 reduced through behavioral strategies such as volunteering and information campaigns.  
493 It identified that eco-anxiety is a motivating factor encouraging people to take action, as  
494 well as several negative effects of eco-anxiety on the quality of life. The study expanded  
495 upon past research efforts that proposed behavioral strategies to reduce eco-anxiety by  
496 finding a significant association between volunteering efforts and predicted anxiety  
497 reduction. This is a novel solution, as volunteering for environmental organizations can  
498 reduce the negative effects of eco-anxiety while retaining motivation and interest and  
499 simultaneously have a positive impact on the environment. To encourage more people  
500 to volunteer, our study identified the importance of promoting information on how to get  
501 involved and encouraging newcomers. Future experimental research could test the  
502 impact of environmental volunteering to more clearly establish these effects.

503         The research also further explored the role of media and information on eco-  
504 anxiety, indicating that media about climate change can be overwhelming and  
505 contribute to higher rates of anxiety. To reduce this issue, it is important to cover climate  
506 change information in a way that is easy to understand by all populations. The media  
507 could also be used to promote information about how to get involved with local  
508 environmental volunteer groups, helping to encourage more people to get involved and  
509 reduce eco-anxiety. Media and online services can also be utilized to provide better  
510 climate mental health treatment access; Taylor (2020) notes that the COVID-19  
511 pandemic has necessitated rapid online mental health service delivery, and that these  
512 advances could be adapted to help address climate anxiety.

513         Women and younger people were found to have a greater likelihood of eco-

514 anxiety. Efforts and interventions to reduce eco-anxiety should be especially tailored  
515 towards women and young people to help combat this effect. The lack of a statistically  
516 significant relationship between education, political party membership, and eco-anxiety  
517 was unexpected and merits further study. Future research should also delve deeper into  
518 the association of eco-anxiety with age, gender, and other demographic factors.  
519 Potential changes to the experimental procedure would be to ask more questions  
520 surrounding age and youth perceptions of climate change, as previous studies identified  
521 that younger people were more likely to be eco-anxious, or questions targeting  
522 underrepresented racial, gender, and economic groups. Mixed-methods research could  
523 also be used to more deeply understand respondents' experiences, attitudes and  
524 associations and possible reasons for them. Qualitative exploration has not yet been  
525 widely used in environmental epidemiology research, but has great promise for helping  
526 better understand causal processes and develop effective interventions (Noël,  
527 Vanroelen, & Gadeyne, 2021).

528         Furthermore, future studies should be conducted in multiple languages and with  
529 larger sample sizes to reduce the limitations of the study and further establish the  
530 robustness and reproducibility of the findings. Future research could also evaluate  
531 groups of people with and without eco-anxiety and assess the direct effects of different  
532 volunteering efforts or types of media exposure on anxiety reduction.

533

534



535 **Financial Support**

536 This research received no specific grant from any funding agency, commercial or not-  
537 for-profit sectors.

538

539 **Conflicts of Interest**

540 Conflicts of Interest: None.

541

542 **Ethical Standards**

543 The authors assert that all procedures contributing to this work comply with the ethical  
544 standards of the relevant national and institutional committees on human

545 experimentation and with the Helsinki Declaration of 1975, as revised in 2008.

546 Institutional review was provided by WCG IRB. All survey respondents were adults aged

547 18+ who were informed of the objectives of the research and participated voluntarily.

548 Formal consent was not obtained because survey data was collected anonymously.

549

550 **Availability of Data and Materials**

551 Anonymized survey data is available upon request.

552

553 **REFERENCES**

554

555 Albrecht G. (2011) Chronic Environmental Change: Emerging 'Psychoterratic' Syndromes. In:  
556 Weissbecker I. (eds) Climate Change and Human Well-Being. International and Cultural  
557 Psychology. Springer, New York, NY. [https://doi.org/10.1007/978-1-4419-9742-5\\_3](https://doi.org/10.1007/978-1-4419-9742-5_3)

558

559 American Psychiatric Association (APA) (2019) How extreme weather events affect mental  
560 health. APA.org <https://www.psychiatry.org/patients-families/climate-change-and-mental-health-connections/affects-on-mental-health>

562

563 Bahrami, F., & Yousefi, N. (2011). Females are more anxious than males: a metacognitive  
564 perspective. Iranian journal of psychiatry and behavioral sciences, 5(2), 83–90.

565

566 Bowe, M., Wakefield, J. R. H., Kellezi, B., Stevenson, C., McNamara, N., Jones, B. A., Sumich,  
567 A., & Heym, N. (2021). The mental health benefits of community helping during crisis:  
568 Coordinated helping, community identification and sense of unity during the COVID -19  
569 pandemic. Journal of Community & Applied Social Psychology, 32(3), 521–535.  
570 <https://doi.org/10.1002/casp.2520>

571

572 Cann, T., Weaver, I. S., & Williams, H. (2021). Ideological biases in social sharing of online  
573 information about climate change. PloS one, 16(4), e0250656.  
574 <https://doi.org/10.1371/journal.pone.0250656>

575

576 Castellone, M.S. (2018, January 9). Coming to terms with ecoanxiety. Psychology today.  
577 <https://www.psychologytoday.com/au/blog/the-me-in-we/201801/coming-terms-ecoaxiety>

578

579 Cianconi, P., Betrò, S., & Janiri, L. (2020). The Impact of Climate Change on Mental Health: A  
580 Systematic Descriptive Review. *Frontiers in psychiatry*, 11, 74.  
581 <https://doi.org/10.3389/fpsy.2020.00074>

582

583 Clayton S. (2020). Climate anxiety: Psychological responses to climate change. *Journal of*  
584 *anxiety disorders*, 74, 102263. <https://doi.org/10.1016/j.janxdis.2020.102263>

585

586 Clayton, S. & Karazsia, B.T. (2020) Development and validation of a measure of climate change  
587 anxiety. *Journal of environmental psychology*, 69. <https://doi.org/10.1016/j.jenvp.2020.101434>

588

589 Comtesse, H., Ertl, V., Hengst, S., Rosner, R., & Smid, G. E. (2021). Ecological Grief as a  
590 Response to Environmental Change: A Mental Health Risk or Functional Response?  
591 *International journal of environmental research and public health*, 18(2), 734.  
592 <https://doi.org/10.3390/ijerph18020734>

593

594 Cunsolo, A., Harper, S. L., Minor, K., Hayes, K., Williams, K. G., & Howard, C. (2020).  
595 Ecological grief and anxiety: the start of a healthy response to climate change?. *The Lancet.*  
596 *Planetary health*, 4(7), e261–e263. [https://doi.org/10.1016/S2542-5196\(20\)30144-3](https://doi.org/10.1016/S2542-5196(20)30144-3)

597

598 Dailianis, A.T. (2020). Eco-anxiety: A scoping review towards a clinical conceptualisation and  
599 therapeutic approach. Unpublished master's thesis, Auckland University of Technology.  
600 <https://openrepository.aut.ac.nz/bitstream/handle/10292/14343/DailianisA.pdf?sequence=3&isAl>  
601 [lowed=y](#)

602

- 603 Demski, C., Capstick, S., Pidgeon, N., Sposato, R. G., & Spence, A. (2017). Experience of  
604 extreme weather affects climate change mitigation and adaptation responses. *Climatic change*,  
605 140(2), 149–164. <https://doi.org/10.1007/s10584-016-1837-4>  
606
- 607 Dodds J. (2021). The psychology of climate anxiety. *BJPsych bulletin*, 45(4), 222–226.  
608 <https://doi.org/10.1192/bjb.2021.18>  
609
- 610 Duffy A. (2022). Commentary: What price eyeballs? - A commentary/reflection on Benoit,  
611 Thomas and Martin (2021). *Child and adolescent mental health*, 27(1), 87–88.  
612 <https://doi.org/10.1111/camh.12522>  
613
- 614 Edwards, B., Gray, M., & Borja, J. (2021). The influence of natural disasters on violence, mental  
615 health, food insecurity, and stunting in the Philippines: Findings from a nationally representative  
616 cohort. *SSM - population health*, 15, 100825. <https://doi.org/10.1016/j.ssmph.2021.100825>  
617
- 618 Generaal, E., Timmermans, E. J., Dekkers, J., Smit, J. H., & Penninx, B. (2019). Not  
619 urbanization level but socioeconomic, physical and social neighbourhood characteristics are  
620 associated with presence and severity of depressive and anxiety disorders. *Psychological*  
621 *medicine*, 49(1), 149–161. <https://doi.org/10.1017/S0033291718000612>  
622
- 623 Hayes, K., Blashki, G., Wiseman, J., Burke, S., & Reifels, L. (2018). Climate change and mental  
624 health: risks, impacts and priority actions. *International journal of mental health systems*, 12, 28.  
625 <https://doi.org/10.1186/s13033-018-0210-6>  
626
- 627 Hickman, C., Marks, E., Pihkala, P., Clayton, S., Lewandowski, R. E., Mayall, E. E., Wray, B.,  
628 Mellor, C., & van Susteren, L. (2021). Climate anxiety in children and young people and their

629 beliefs about government responses to climate change: a global survey. *The Lancet. Planetary*  
630 *health*, 5(12), e863–e873. [https://doi.org/10.1016/S2542-5196\(21\)00278-3](https://doi.org/10.1016/S2542-5196(21)00278-3)

631

632 Howarth, M., Griffiths, A., da Silva, A., & Green, R. (2020). Social prescribing: a 'natural'  
633 community-based solution. *British journal of community nursing*, 25(6), 294–298.  
634 <https://doi.org/10.12968/bjcn.2020.25.6.294>

635

636 Hurley, E. A., Dalglish, S. L., & Sacks, E. (2022). Supporting young people with climate anxiety:  
637 mitigation, adaptation, and resilience. *The Lancet. Planetary health*, 6(3), e190.  
638 [https://doi.org/10.1016/S2542-5196\(22\)00015-8](https://doi.org/10.1016/S2542-5196(22)00015-8)

639

640 Maran, D. A., & Begotti, T. (2021). Media Exposure to Climate Change, Anxiety, and Efficacy  
641 Beliefs in a Sample of Italian University Students. *International journal of environmental*  
642 *research and public health*, 18(17), 9358. <https://doi.org/10.3390/ijerph18179358>

643

644 Middleton, J., Cunsolo, A., Jones-Bitton, A., Shiwak, I., Wood, M., Pollock, N., Flowers, C., &  
645 Harper, S. L. (2020). "We're people of the snow:" Weather, climate change, and Inuit mental  
646 wellness. *Social science & medicine* (1982), 262, 113137.

647

648 Middleton, J., Cunsolo, A., Jones-Bitton, A., Wright, C.J., & Harper, S.L. (2020). Indigenous  
649 mental health in a changing climate: a systematic scoping review of the global literature.  
650 *Environmental research letters*, 15(5). <https://iopscience.iop.org/article/10.1088/1748->

651 [9326/ab68a9](https://iopscience.iop.org/article/10.1088/1748-9326/ab68a9)

652

- 653 Munford, L. A., Panagioti, M., Bower, P., & Skevington, S. M. (2020). Community asset  
654 participation and social medicine increases qualities of life. *Social science & medicine* (1982),  
655 259, 113149. <https://doi.org/10.1016/j.socscimed.2020.113149>  
656
- 657 Noël, C., Vanroelen, C., & Gadeyne, S. (2021). Qualitative research about public health risk  
658 perceptions on ambient air pollution. A review study. *SSM - population health*, 15, 100879.  
659 <https://doi.org/10.1016/j.ssmph.2021.100879>  
660
- 661 Obradovich, N., Migliorini, R., Paulus, M. P., & Rahwan, I. (2018). Empirical evidence of mental  
662 health risks posed by climate change. *Proceedings of the National Academy of Sciences of the*  
663 *United States of America*, 115(43), 10953–10958. <https://doi.org/10.1073/pnas.1801528115>  
664
- 665 Parker, C. L., Wellbery, C. E., & Mueller, M. (2019). The changing climate: Managing health  
666 impacts. *American family physician*, 100(10), 618–626.  
667
- 668 Pihkala, P. (2018). Eco-anxiety, tragedy and hope: Psychological and spiritual dimensions of  
669 climate change. *Zygon*, 53: 545-569. <https://doi.org/10.1111/zygo.12407>  
670
- 671 Poon, C. S., Koehler, D. J., & Buehler, R. (2014). On the psychology of self-prediction:  
672 Consideration of situational barriers to intended actions. *Judgment & decision making*, 9(3).  
673 <https://EconPapers.repec.org/RePEc:jdm:journl:v:9:y:2014:i:3:p:207-225>  
674
- 675 Ramadan, A., & Ataallah, A. G. (2021). Are climate change and mental health correlated?  
676 *General psychiatry*, 34(6), e100648. <https://doi.org/10.1136/gpsych-2021-100648>  
677

- 678 Ramadan, R., Randell, A., Lavoie, S., Gao, C.X., Manrique, P.C., Anderson, R., & Zbukvic, I.C.  
679 (2021). Understanding the evidence for climate concerns, negative emotions and climate-  
680 related mental ill-health in young people: a scoping review. Accessed May 29, 2022 from  
681 medRxiv.  
682 <https://www.medrxiv.org/content/medrxiv/early/2021/09/29/2021.09.27.21264151.full.pdf>  
683
- 684 Rao, M. and Powell, R.A. (2021, October 6). The climate crisis and the rise of eco-anxiety. The  
685 BMJ opinion. Accessed May 30, 2022 at [https://blogs.bmj.com/bmj/2021/10/06/the-climate-](https://blogs.bmj.com/bmj/2021/10/06/the-climate-crisis-and-the-rise-of-eco-anxiety/)  
686 [crisis-and-the-rise-of-eco-anxiety/](https://blogs.bmj.com/bmj/2021/10/06/the-climate-crisis-and-the-rise-of-eco-anxiety/)  
687
- 688 Reyes, M., Carmen, B., Luminarias, M., Mangulabnan, S., & Ogunbode, C.A. (2021). An  
689 investigation into the relationship between climate change anxiety and mental health among  
690 Gen Z Filipinos. *Current psychology* (New Brunswick, N.J.), 1–9. Advance online publication.  
691 <https://doi.org/10.1007/s12144-021-02099-3>  
692
- 693 Robinette, J. W., Charles, S. T., & Gruenewald, T. L. (2018). Neighborhood cohesion,  
694 neighborhood disorder, and cardiometabolic risk. *Social science & medicine* (1982), 198, 70–76.  
695 <https://doi.org/10.1016/j.socscimed.2017.12.025>  
696
- 697 Robinette, J. W., Bostean, G., Glynn, L. M., Douglas, J. A., Jenkins, B. N., Gruenewald, T. L., &  
698 Frederick, D. A. (2021). Perceived neighborhood cohesion buffers COVID-19 impacts on mental  
699 health in a United States sample. *Social science & medicine* (1982), 285, 114269.  
700 <https://doi.org/10.1016/j.socscimed.2021.114269>  
701
- 702 Sanson, A., & Bellemo, M. (2021). Children and youth in the climate crisis. *BJPsych bulletin*,  
703 45(4), 205–209. <https://doi.org/10.1192/bjb.2021.16>

- 704
- 705 Schwartz, S., Benoit, L., Clayton, S., Parnes, M. F., Swenson, L., & Lowe, S. R. (2022). Climate  
706 change anxiety and mental health: Environmental activism as buffer. *Current psychology* (New  
707 Brunswick, N.J.), 1–14. Advance online publication. <https://doi.org/10.1007/s12144-022-02735-6>  
708
- 709 Stanley, S., Hogg, T., Leviston, Z. & Walker, I. (2021). From anger to action: Differential impacts  
710 of eco-anxiety, eco-depression, and eco-anger on climate action and wellbeing. *The Journal of*  
711 *Climate Change and Health*.
- 712
- 713 Svensson, S. J., & Elntib, S. (2021). Community cohesion during the first peak of the COVID-19  
714 pandemic: A social antidote to health anxiety and stress. *Journal of applied social psychology*,  
715 10.1111/jasp.12800. Advance online publication. <https://doi.org/10.1111/jasp.12800>  
716
- 717 Taylor S. (2020). Anxiety disorders, climate change, and the challenges ahead: Introduction to  
718 the special issue. *Journal of anxiety disorders*, 76, 102313.  
719 <https://doi.org/10.1016/j.janxdis.2020.102313>  
720
- 721 Usher, K., Durkin, J., & Bhullar, N. (2019). Eco-anxiety: How thinking about climate change-  
722 related environmental decline is affecting our mental health. *International journal of mental*  
723 *health nursing*, 28(6), 1233–1234. <https://doi.org/10.1111/inm.12673>  
724
- 725 Verbeek T. (2018). Unequal residential exposure to air pollution and noise: A geospatial  
726 environmental justice analysis for Ghent, Belgium. *SSM - population health*, 7, 100340.  
727 <https://doi.org/10.1016/j.ssmph.2018.100340>  
728
- 729 Vergunst, F., & Berry, H. L. (2021). *Climate Change and Children's Mental Health: A*



730 Developmental Perspective. *Clinical Psychological Science*.

731 <https://doi.org/10.1177/21677026211040787>

732

733 Verplanken, B., & Roy, D. (2013). "My worries are rational, climate change is not": habitual  
734 ecological worrying is an adaptive response. *PloS one*, 8(9), e74708.

735 <https://doi.org/10.1371/journal.pone.0074708>

736

737 Warsini, S., West, C., Ed Tt, G. D., Res Meth, G. C., Mills, J., & Usher, K. (2014). The  
738 psychosocial impact of natural disasters among adult survivors: an integrative review. *Issues in*  
739 *mental health nursing*, 35(6), 420–436. <https://doi.org/10.3109/01612840.2013.875085>

740

741 World Health Organization (WHO) (2021, October 30) Climate change and health. WHO  
742 website. <https://www.who.int/news-room/fact-sheets/detail/climate-change-and-health>

743

744 Wu, J., Snell, G., & Samji, H. (2020). Climate anxiety in young people: a call to action. *The*  
745 *Lancet: Planetary health*, 4(10), e435–e436. [https://doi.org/10.1016/S2542-5196\(20\)30223-0](https://doi.org/10.1016/S2542-5196(20)30223-0)

746

747

Figure 1: Logistic regression classification accuracy

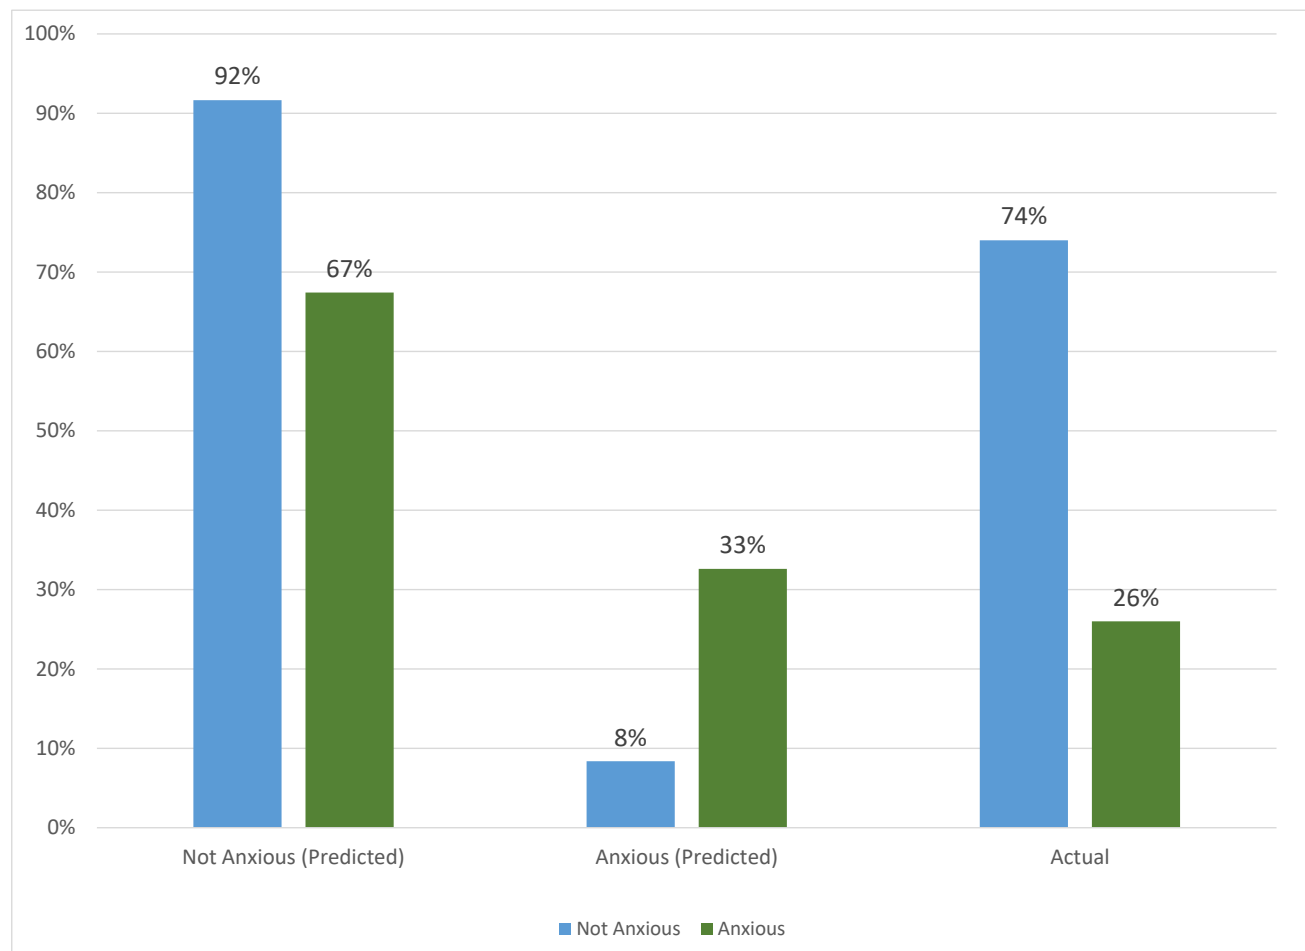

Figure 2: Beliefs about climate change

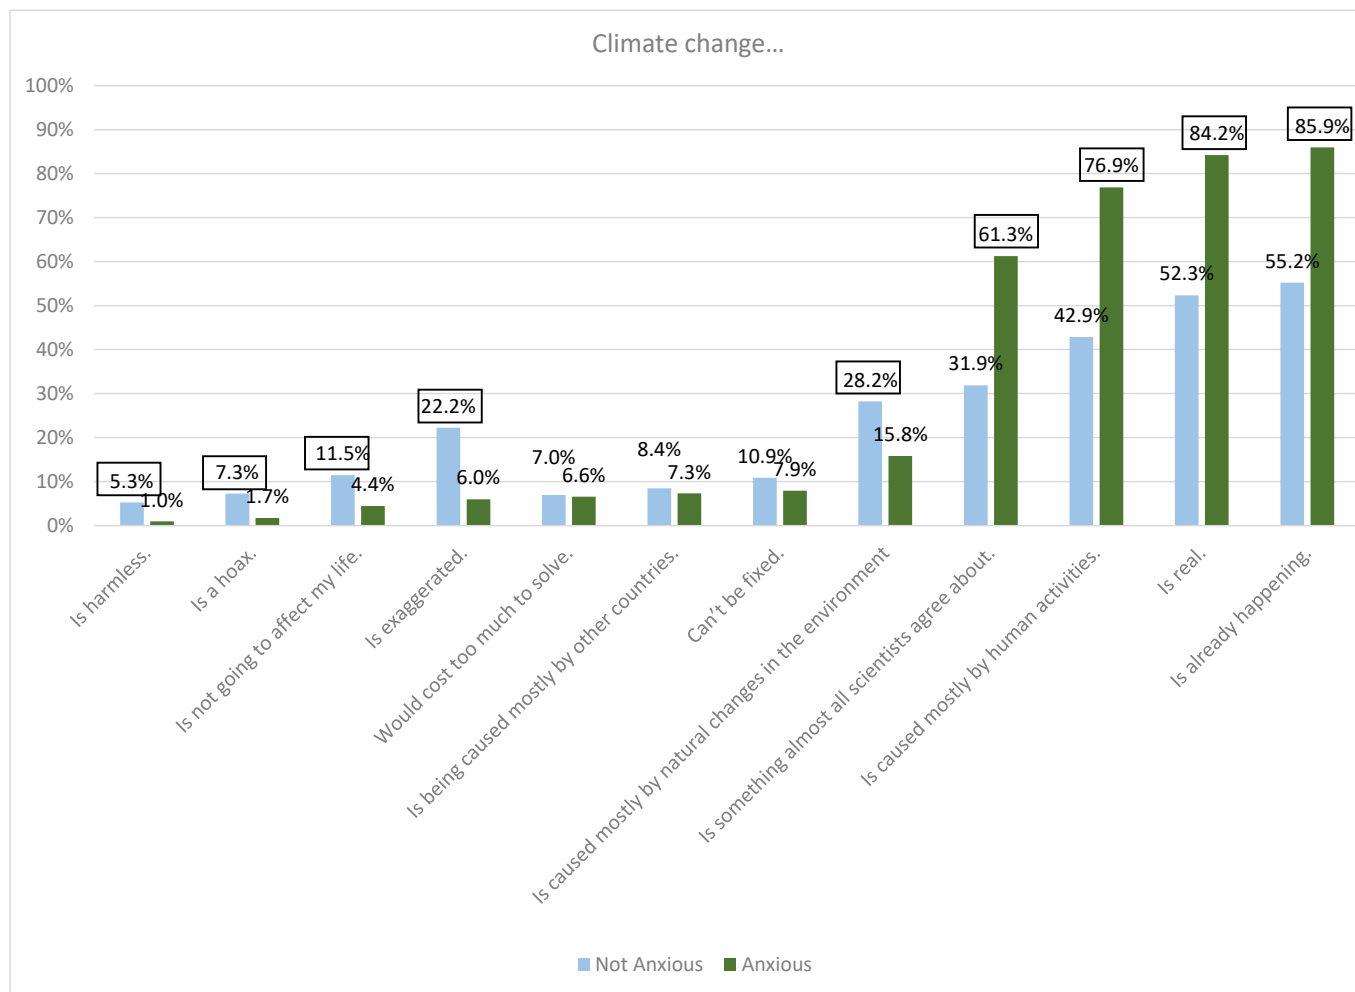

Survey question: *Select all of the statements you agree with. Climate change...*

Boxed numbers on graph are higher than comparison group at  $p < .05$ .

Figure 3: Perceptions of information about climate change

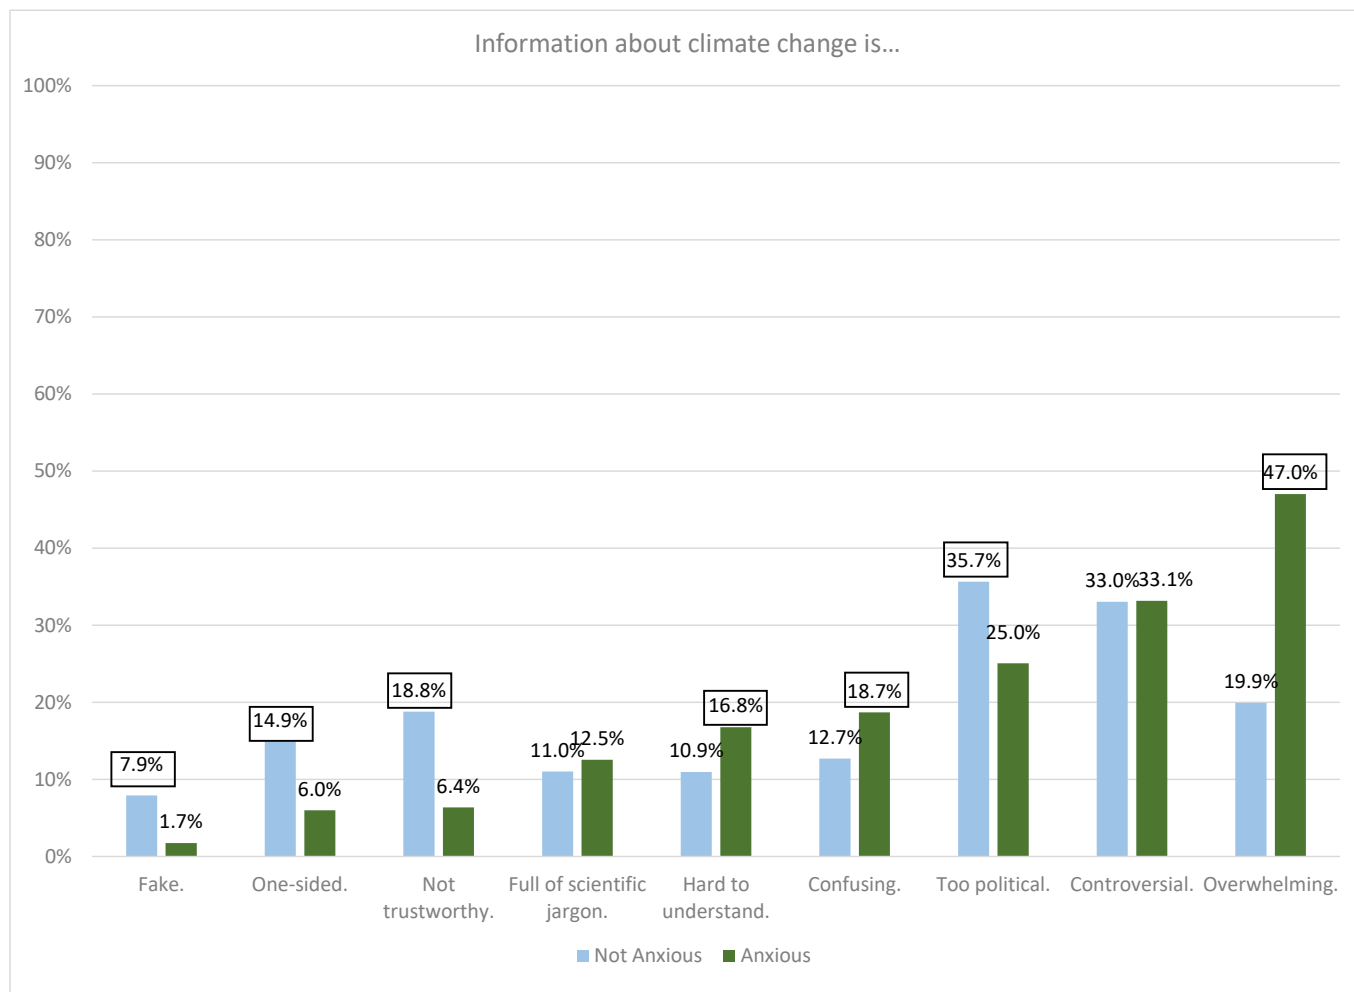

Survey question: *Please select all the statements you agree with. Information about climate change is...*

Boxed numbers on graph are higher than comparison group at  $p < .05$ .

Figure 4: Feelings about climate change

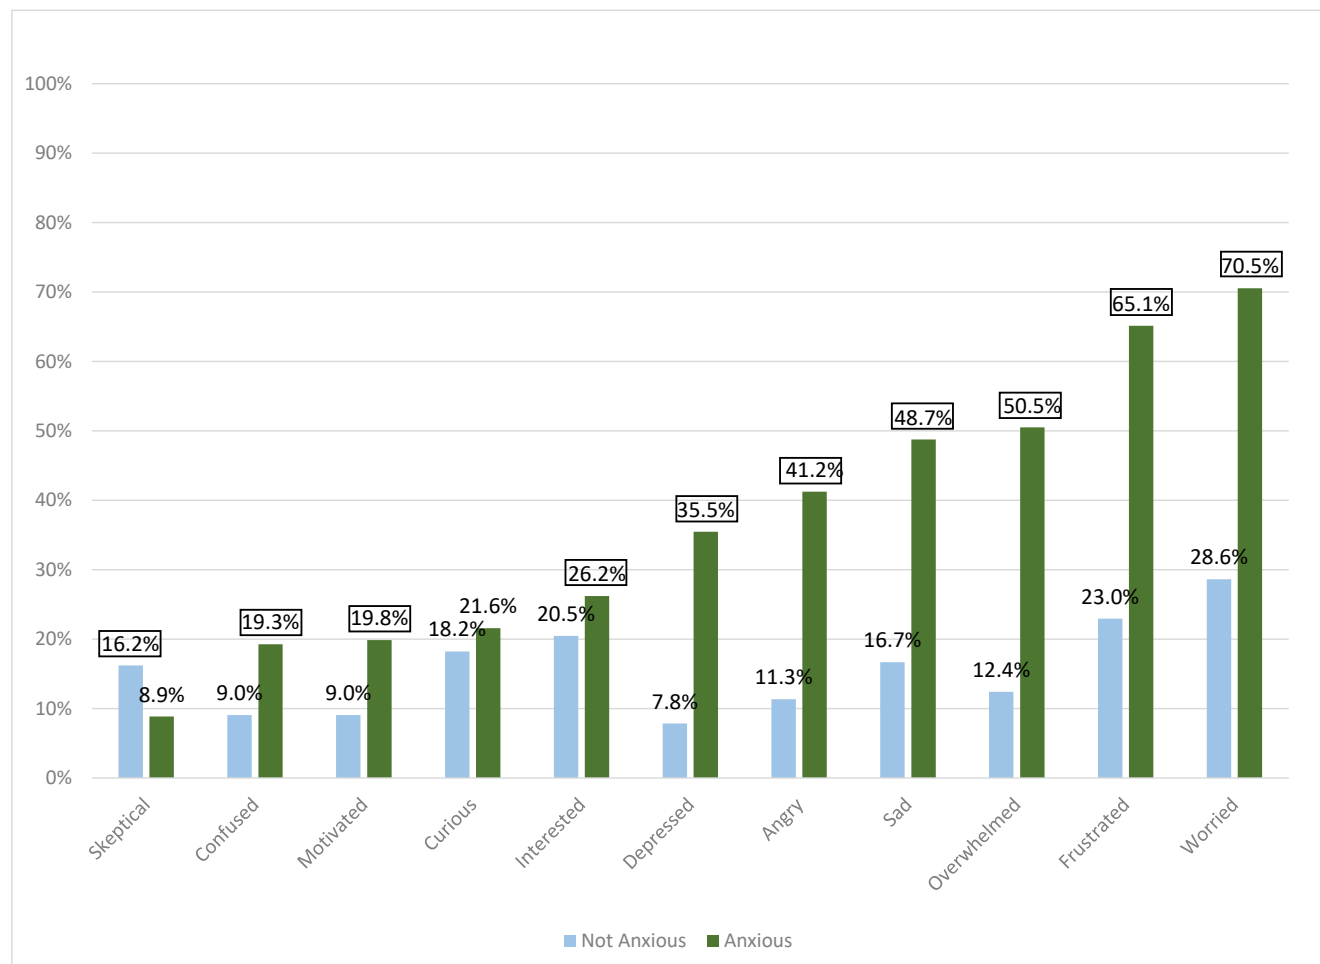

Survey question: *Which, if any, of the following words describe how climate change makes you feel? Select all that apply.*

Boxed numbers on graph are higher than comparison group at  $p < .05$ .

Figure 5: Climate change impact on mental health

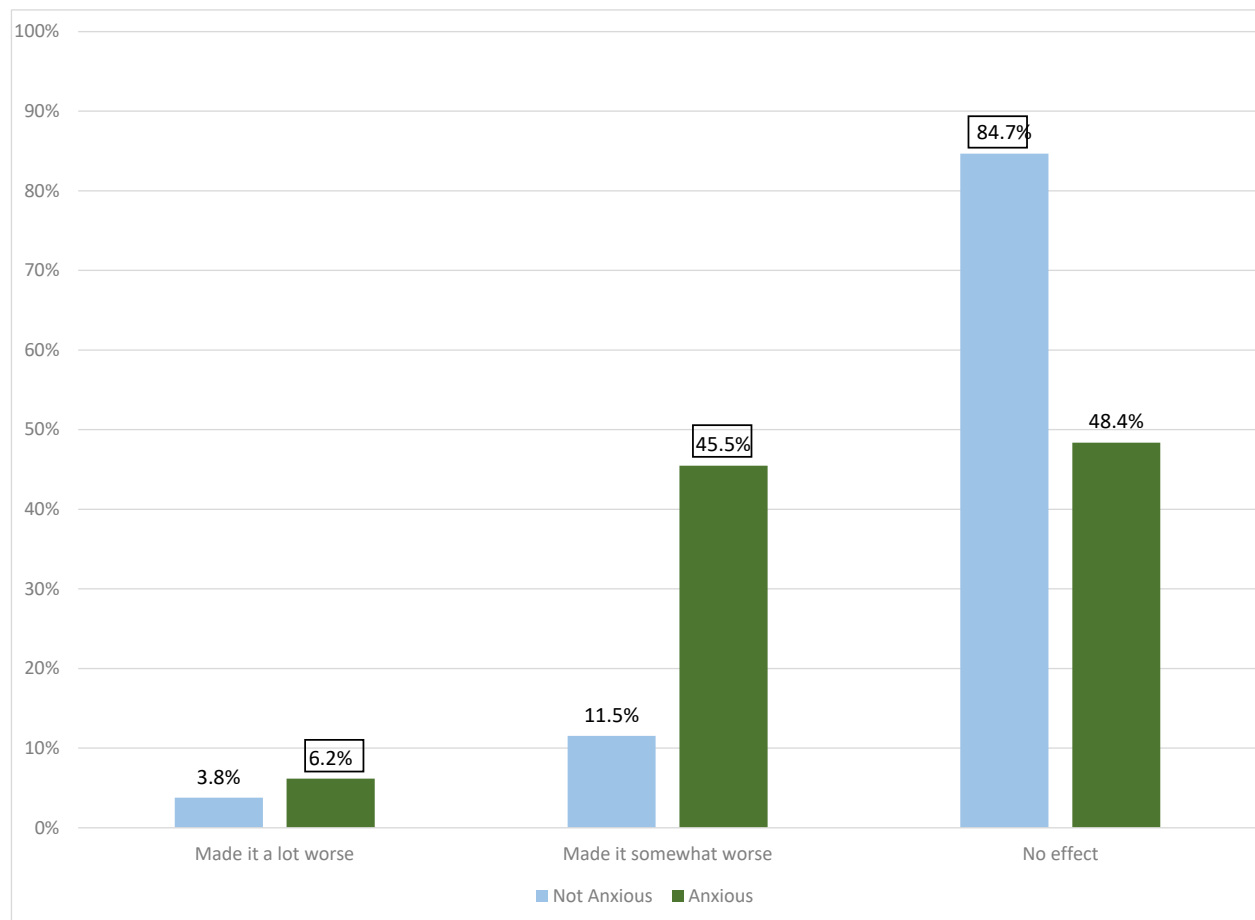

Survey question: *How has climate change affected your mental health, if at all?*

Boxed numbers on graph are higher than comparison group at  $p < .05$ .

Figure 6: Cognitive and functional impairments due to eco-anxiety

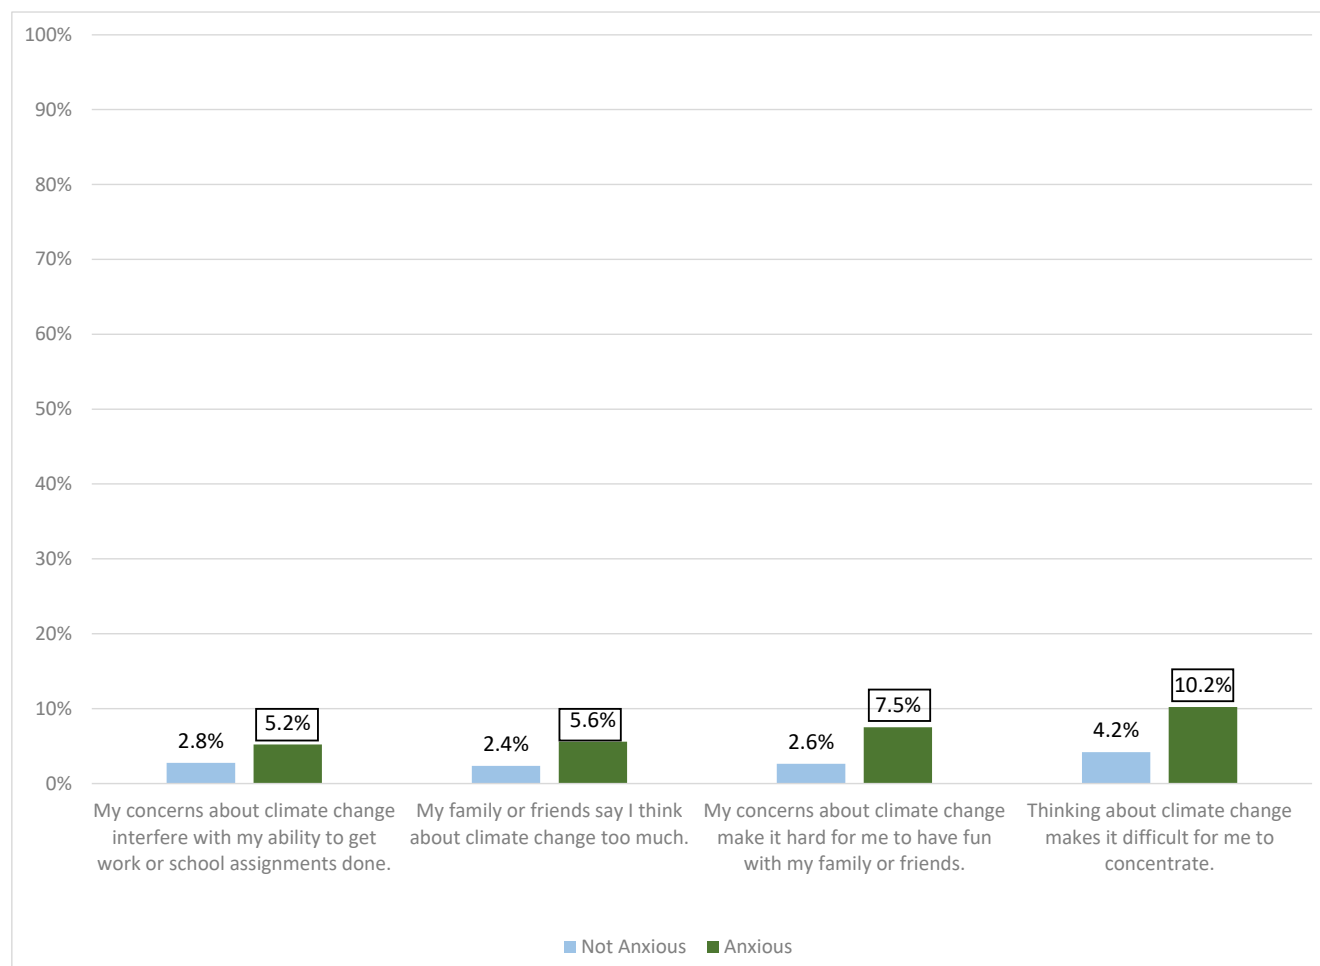

Survey question: *Select all of the statements you agree with regarding climate change.*

Boxed numbers on graph are higher than comparison group at  $p < .05$ .

Figure 7: Environmental behaviors

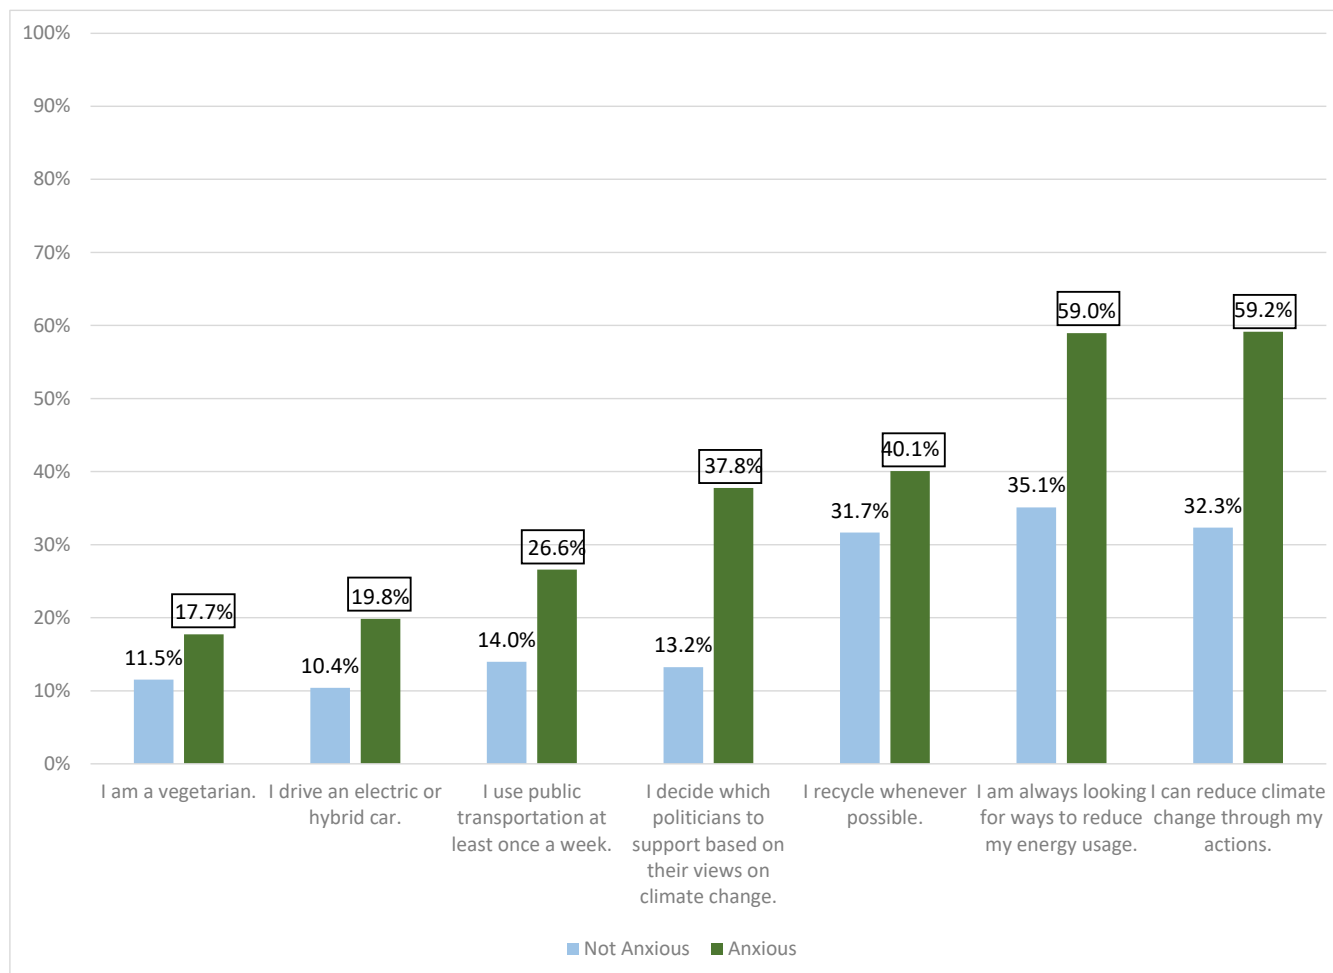

Survey question: *Please select the statements that describe you. Select all that apply.*

Boxed numbers on graph are higher than comparison group at  $p < .05$ .



Figure 8: Current charitable behavior

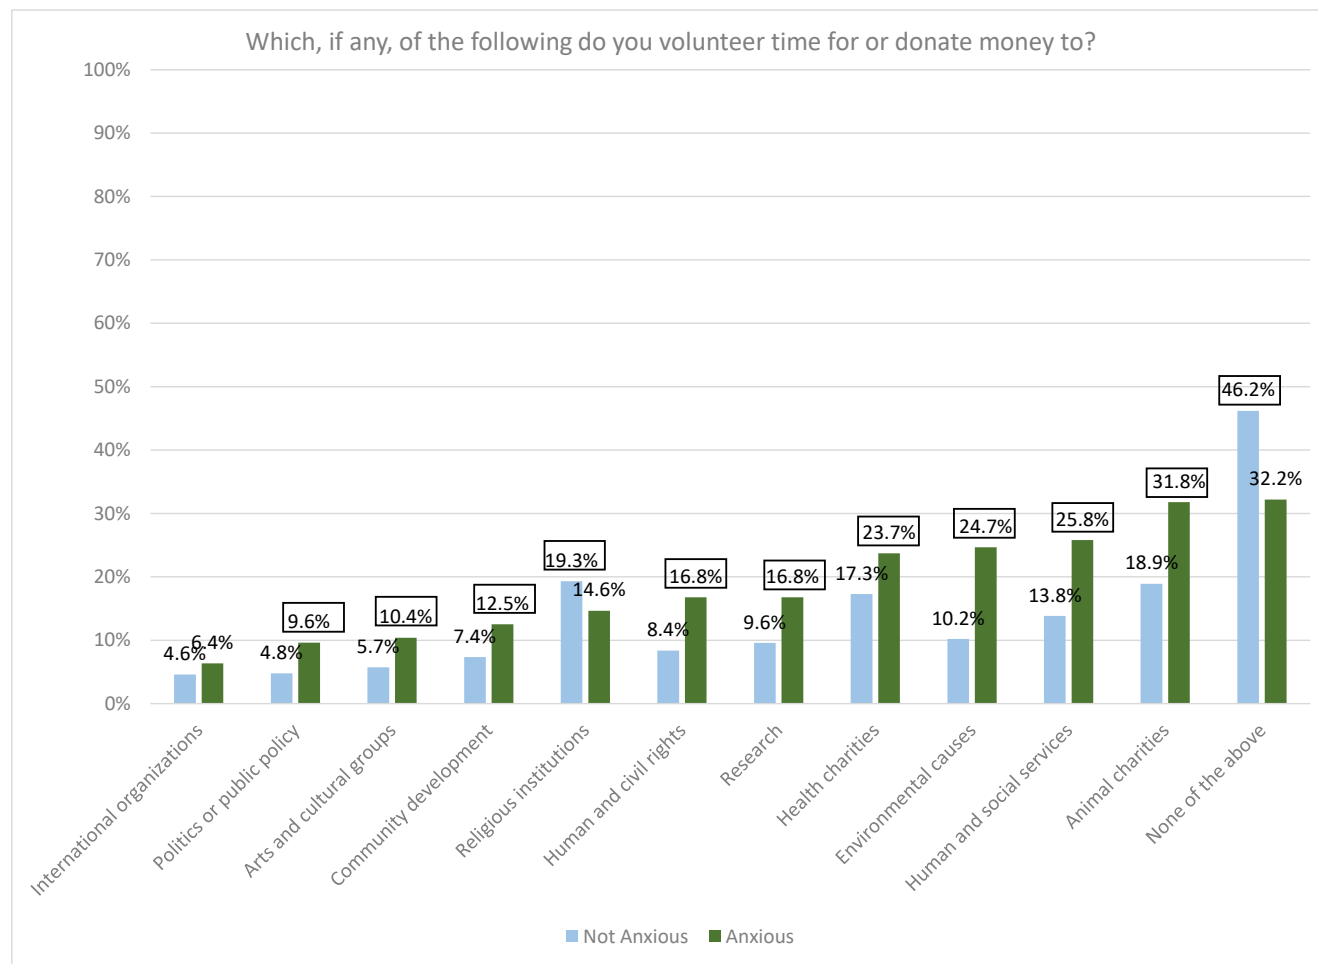

Survey question: *Which, if any, of the following do you volunteer time for or donate money to? Select all that apply.*

Boxed numbers on graph are higher than comparison group at  $p < .05$ .

Figure 9: Reasons respondent does not volunteer for or donate to environmental organizations

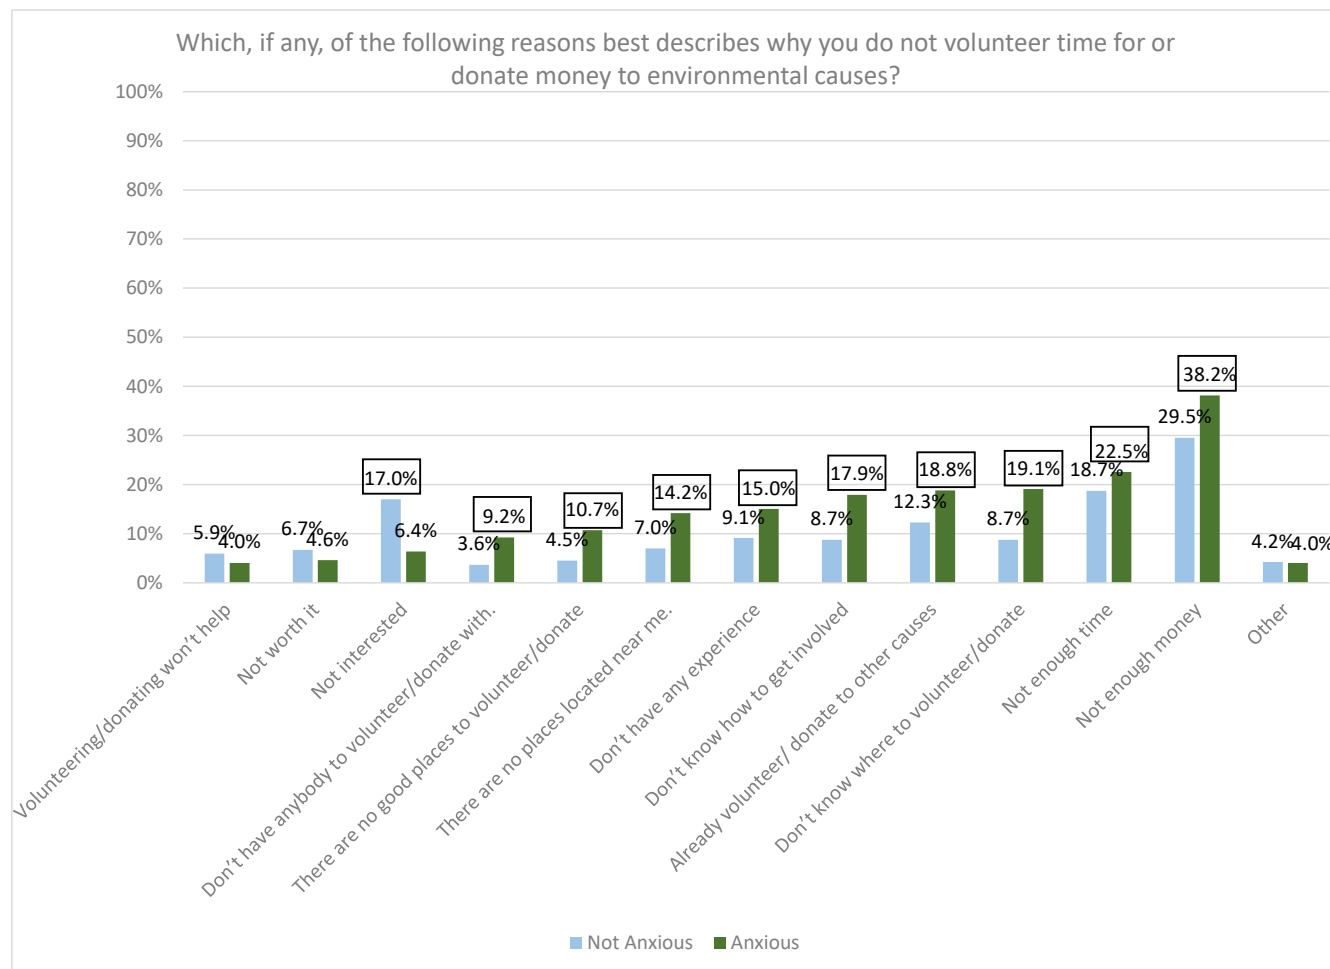

Survey question (Asked only of those who indicated they did not volunteer for or donate to environmental causes): *Which, if any, of the following reasons best describes why you do not volunteer time for or donate money to environmental causes?*

Boxed numbers on graph are higher than comparison group at  $p < .05$ .

Figure 10: Factors that would make respondent feel less worried or anxious about climate change

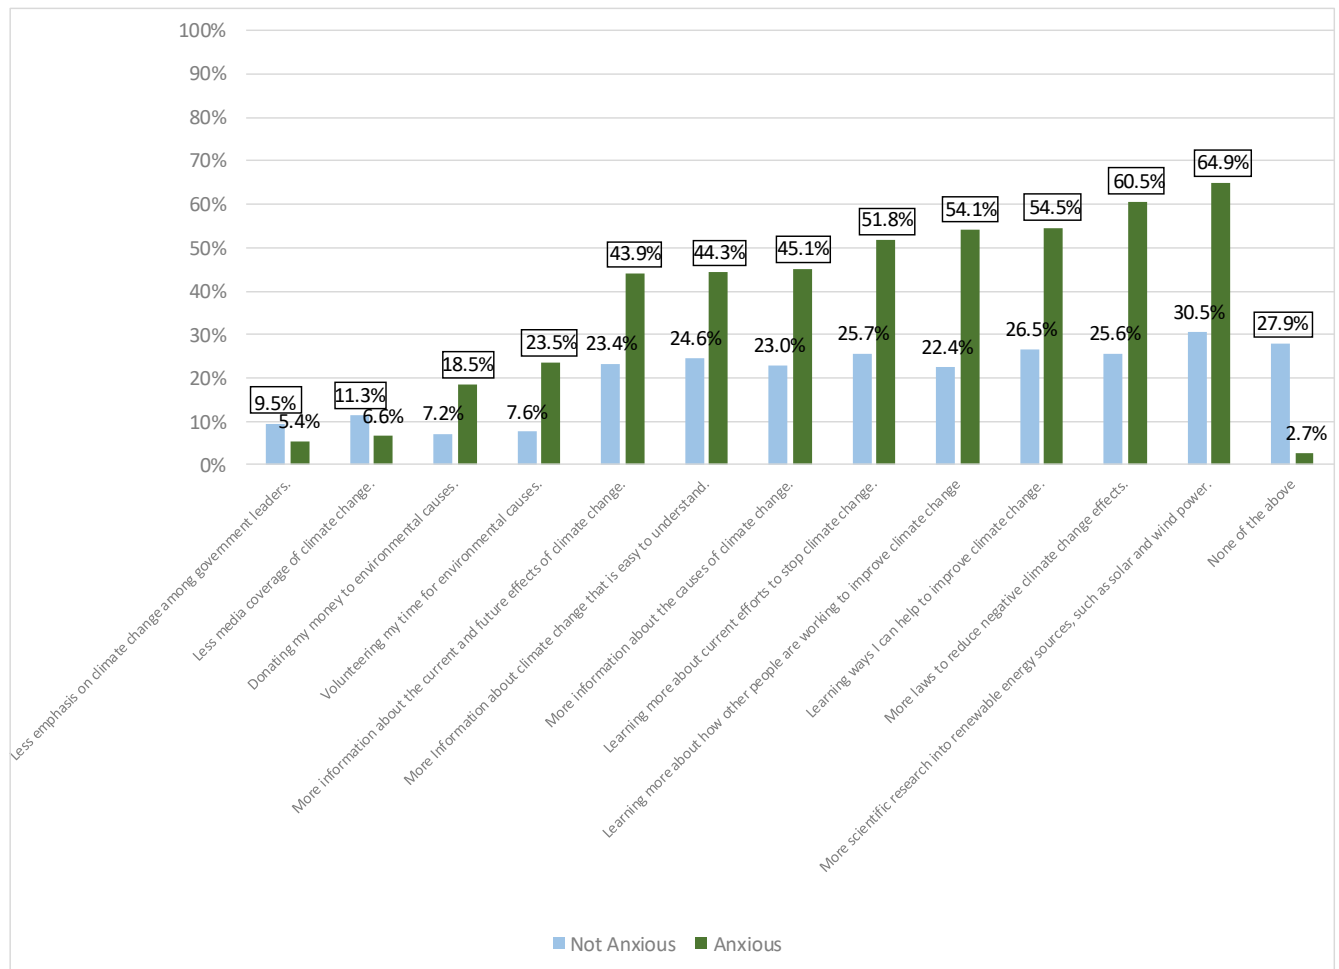

Survey question: *Which, if any, of the following would make you feel less worried or anxious about climate change? Select all that apply.*

Boxed numbers on graph are higher than comparison group at  $p < .05$ .
